# Supplementary material for: Synthesis of a flower-like Co-doped Ni(OH)2 composite for high-performance supercapacitors
Source: Royal Society of Chemistry journal article supplement (doi:10.1039/c5ra03774c), 2015-01-01
Supplement: c5ra03774c1.pdf [file c5ra03774c1.pdf]

## **Synthesis Flowers-like Co-doped Ni(OH)<sub>2</sub> Composite for High-performance Supercapacitors**

Qi Wang, Suwen Liu,\* Haiyan Sun and Qifang Lu

School of Material Science and Engineering, Qilu University of Technology,  
Jinan, 250353, P. R. China

\*E-mail: [liusw@qlu.edu.cn](mailto:liusw@qlu.edu.cn)

## SUPPORTING INFORMATION

**Figure S1** The N<sub>2</sub> adsorption-desorption isotherm of the pure Ni(OH)<sub>2</sub>.

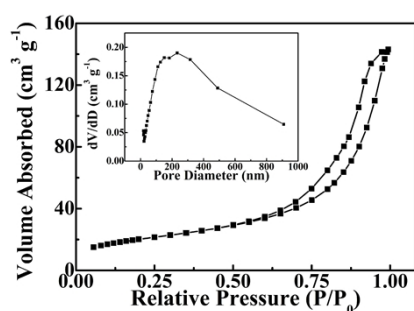

**Figure S2** CV curves of the Co-doped Ni(OH)<sub>2</sub> composite electrodes using two-electrode at a scan rate of 50 mV s<sup>-1</sup>.

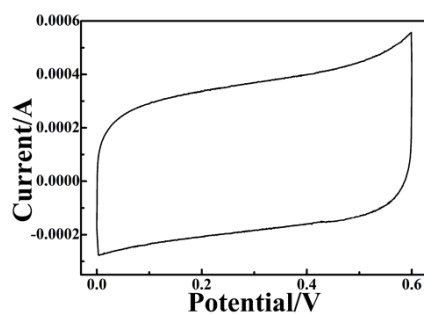

**Table S1** Values of specific capacitance (F g<sup>-1</sup>) of the Co-doped Ni(OH)<sub>2</sub> composite electrodes depending on cell type at a scan rate of 50 mV s<sup>-1</sup>.

| type            | Values of specific capacitance (F g <sup>-1</sup> ) |
|-----------------|-----------------------------------------------------|
| Three-electrode | 677.3                                               |
| Two-eletrode    | 149.7                                               |

**Figure S3** Galvanostatic discharge curves of the Co-doped Ni(OH)<sub>2</sub> composite using two-electrode.

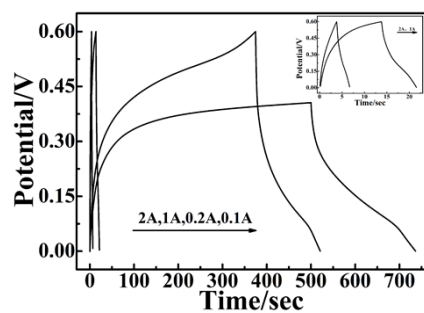

**Figure S4** Nyquist plot of Co-doped Ni(OH)<sub>2</sub> composite using the 2-electrode.

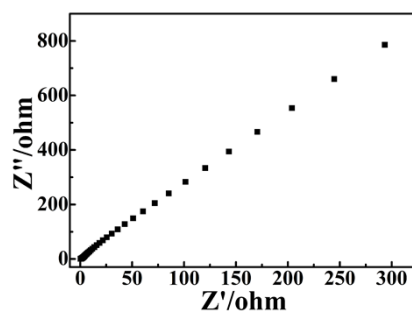

It should be noted that a three-electrode cell is valuable for quickly determining material electrochemical characteristics whereas a two-electrode cell shows the physical configuration, internal voltages and charge transfer that occurs in a packaged supercapacitor and thus provides the best indication of an electrode performance for industrial applications.<sup>1</sup> Therefore we fabricate the two-electrode supercapacitor device of the Co-doped Ni(OH)<sub>2</sub> composite, measure the CV, galvanostatic charge-discharge curves and Nyquist plot (Figure S2, S3 and S4 ). CV curves of the Co-doped Ni(OH)<sub>2</sub> composite electrodes using two-electrode in Figure S2. From the figure we can see that the CV curve tends to be rectangular. Table S1 lists the specific capacitance calculated according to the CV curve, as measured with each cell type. As seen from the table, the specific capacitance calculated by the three-electrode cell yields values is approximately four times those of the two-electrode cell. From the Galvanostatic discharge curves (Figure S3), we can see that the curves of discharge is very steep compare with the curves using the three-electrode. There was not appear the arc in high frequency area, and the angle of the straight line and the z axis is small in low frequency area (Figure S4).

## ACKNOWLEDGMENTS

This work was supported by the National Natural Science Foundation of China (Grant No. 51172133), Key Project of Chinese Ministry of Education (Grant No. 211098), Project of university innovation of Jinan (Grant No. 201311034) and Ministry of Education of Shandong Province (Grant No. J13LA01). The authors also thank the Analytical Center of Qilu University of Technology for technological support.

## ■ REFERENCES

- (1) Stoller, M. D.; Ruoff, R. S. Best practice methods for determining an electrode material's performance for ultracapacitors, *Energy Environ. Sci.* **2010**, 3, 1294.
